# Supplementary material for: The finite state projection based Fisher information matrix approach to estimate information and optimize single-cell experiments
Source: PLOS journal article supplement (doi:10.1371/journal.pcbi.1006365), 2019-01-15
Supplement: S1 (10.1371/journal.pcbi.1006365.s001) [file journal.pcbi.1006365.s001]

# S1 Text for

The finite state projection based Fisher information matrix approach to  
estimate and maximize the information in single-cell experiments

Zachary R. Fox, Brian Munsky

correspondence to: munsky@colostate.edu

## Contents

|          |                                                             |          |
|----------|-------------------------------------------------------------|----------|
| <b>1</b> | <b>Logarithmic Parameterization of the FSP-FIM</b>          | <b>2</b> |
| <b>2</b> | <b>Central Limit Theorem Approximation</b>                  | <b>2</b> |
| <b>3</b> | <b>Generation and fitting of simulated data</b>             | <b>3</b> |
| <b>4</b> | <b>Derivation of information for Gaussian fluctuations</b>  | <b>4</b> |
| <b>5</b> | <b>Derivation of information for a Poisson distribution</b> | <b>4</b> |

# 1 Logarithmic Parameterization of the FSP-FIM

As noted in [1], in many biological systems, rates vary by several orders of magnitude. Therefore, it may be of interest to consider the relative change in parameter values and formulate the FIM in terms of the logarithm of the parameters,

$$\mathcal{I}(\log \boldsymbol{\theta}) = \mathbf{E} \left[ \left( \nabla_{\log \boldsymbol{\theta}} \log p(\mathbf{X}; \boldsymbol{\theta}) \right)^T \left( \nabla_{\log \boldsymbol{\theta}} \log p(\mathbf{X}; \boldsymbol{\theta}) \right) \right] \quad (1)$$

The logarithmic parameterization carries through to the computation of the sensitivity matrix,

$$\nabla_{\boldsymbol{\theta}} \log p(x; \boldsymbol{\theta}) = \begin{pmatrix} \frac{1}{p_0} \frac{\partial p_0}{\partial \log \theta_1} & \frac{1}{p_0} \frac{\partial p_0}{\partial \log \theta_2} & \cdots & \frac{1}{p_0} \frac{\partial p_0}{\partial \log \theta_{N_p}} \\ \frac{1}{p_1} \frac{\partial p_1}{\partial \log \theta_1} & \frac{1}{p_1} \frac{\partial p_1}{\partial \log \theta_2} & \cdots & \frac{1}{p_1} \frac{\partial p_1}{\partial \log \theta_{N_p}} \\ \vdots & \vdots & \cdots & \vdots \\ \frac{1}{p_N} \frac{\partial p_N}{\partial \log \theta_1} & \frac{1}{p_N} \frac{\partial p_N}{\partial \log \theta_2} & \cdots & \frac{1}{p_N} \frac{\partial p_N}{\partial \log \theta_{N_p}} \end{pmatrix}. \quad (2)$$

Using the relationship  $\frac{\partial f(x)}{\partial \log x} = x \frac{\partial f(x)}{\partial x}$ , we can rewrite Eq. 2 as

$$\nabla_{\log \boldsymbol{\theta}} \log p(\mathbf{x}; \boldsymbol{\theta}) = \mathbf{Q} \mathbf{S} \boldsymbol{\Theta}, \quad (3)$$

where

$$\boldsymbol{\Theta} \equiv \begin{pmatrix} \theta_1 & 0 & \cdots & 0 \\ 0 & \theta_2 & \ddots & 0 \\ \vdots & \ddots & \ddots & \vdots \\ 0 & \cdots & \cdots & \theta_{N_p} \end{pmatrix}$$

and  $\mathbf{Q} = \text{diag}\{\frac{1}{\mathbf{p}}\}$ . Therefore, the logarithmic parameterization is easily found by multiplying the  $i^{\text{th}}$  column in  $\mathbf{S}$  by the corresponding parameter  $\theta_i$ . The log-FSP-FIM can then be computed:

$$\mathcal{I}(\log \boldsymbol{\theta})_{i,j} = N_c \sum_{k=1}^N \frac{\theta_i \theta_j}{p(\mathbf{x}_k; \boldsymbol{\theta})} \mathbf{s}_i^k \mathbf{s}_j^k = \theta_i \theta_j \mathcal{I}(\boldsymbol{\theta})_{i,j}. \quad (4)$$

# 2 Central Limit Theorem Approximation

In [2], the authors suggest approximating the FIM for the sample mean and variance to be jointly Gaussian, i.e. the random vector  $\mathbf{z} = [\boldsymbol{\mu}_s, \boldsymbol{\Sigma}_s]^T$ ,  $Z \sim \mathcal{N}(\mathbf{z}, \mathbf{C})$ , and  $\mathbf{C}$  is the covariance matrix:

$$\mathbf{C} = \begin{pmatrix} \mathbf{C}_{\boldsymbol{\mu}_s \boldsymbol{\mu}_s} & \mathbf{C}_{\boldsymbol{\mu}_s \boldsymbol{\Sigma}_s} \\ (\mathbf{C}_{\boldsymbol{\mu}_s \boldsymbol{\Sigma}_s})^T & \mathbf{C}_{\boldsymbol{\Sigma}_s \boldsymbol{\Sigma}_s} \end{pmatrix}. \quad (5)$$

The submatrices on the diagonal correspond to the variance of  $\boldsymbol{\mu}_s$  and  $\boldsymbol{\Sigma}_s$ , and the off diagonal terms correspond to correlations between the sample means and variances.

In [2], they derive the elements of each of these matrices in terms of the moments of the underlying model distribution  $p(\mathbf{x}|\boldsymbol{\theta})$  for models with one or two species.

For example, consider the variance/covariance of the sample mean is  $\mathbf{C}_{\mu_s \mu_s}$ , where we have the data matrix with  $N$  measurements  $\mathbf{X} = [\mathbf{x}_1^T \ \mathbf{x}_2^T \ \dots \ \mathbf{x}_N^T]^T$ , where each row in the matrix  $\mathbf{X}$  corresponds to a different measurement. The sample mean  $\bar{\mathbf{x}}$  can be written  $\mathbf{1}^T \mathbf{X} / N$ , where  $\mathbf{1}$  is a column vector of ones of size  $N$ . Without loss of generality, let  $\mathbf{E}[\mathbf{x}] = 0$ , and

$$\mathbf{C}_{\mu_s \mu_s} = \frac{1}{N^2} (\mathbf{E}[\mathbf{1}^T \mathbf{X} \mathbf{X}^T \mathbf{1}] - \mathbf{E}[\mathbf{1}^T \mathbf{X}] \mathbf{E}[\mathbf{1}^T \mathbf{X}]^T) \quad (6)$$

$$= \frac{1}{N^2} \mathbf{E}[\mathbf{1}^T \mathbf{X} \mathbf{X}^T \mathbf{1}] = \frac{N}{N^2} \mathbf{E}[\mathbf{X} \mathbf{X}^T] \quad (7)$$

$$= \frac{1}{N} \boldsymbol{\Sigma}. \quad (8)$$

Similar procedures can be used to find the rest of the  $\mathbf{C}$ , and are given in detail in the SI of [2].

In this paper, we compared the FIM for the bursting gene expression model, where only the sample moments were concerned. The formula for the sample-moments FIM for a single species using the sample mean and variance was derived in the SI of [2],

$$\mathcal{I}(\boldsymbol{\theta})_{i,j} = N \frac{\frac{\partial \langle x \rangle}{\partial \theta_i} \frac{\partial \langle x \rangle}{\partial \theta_j}}{\langle \tilde{x}^2 \rangle} + N \frac{\left( \langle \tilde{x}^2 \rangle \frac{\partial \langle \tilde{x}^2 \rangle}{\partial \theta_i} - \frac{\partial \langle x \rangle}{\partial \theta_i} \langle \tilde{x}^3 \rangle \right) \left( \langle \tilde{x}^2 \rangle \frac{\partial \langle \tilde{x}^2 \rangle}{\partial \theta_j} - \frac{\partial \langle x \rangle}{\partial \theta_j} \langle \tilde{x}^3 \rangle \right)}{\langle \tilde{x}^2 \rangle^2 (\langle \tilde{x}^4 \rangle - \langle \tilde{x}^2 \rangle^2) - \langle \tilde{x}^2 \rangle \langle \tilde{x}^3 \rangle^2} + \mathcal{O}(1), \quad (9)$$

where  $\tilde{x}$  refers to the centered moment, i.e.  $\langle \tilde{x}^2 \rangle = \langle (x - \langle x \rangle)^2 \rangle$ .

### 3 Generation and fitting of simulated data

For the simulated studies of the bursting gene expression model and the toggle model, we generated 200 simulated data sets for each analysis by sampling the solution of the FSP solution at a reference parameter set  $\boldsymbol{\theta}^*$ . We used inverse transform sampling to generate 1,000 independent samples from the FSP solution at each time point, which correspond to RNA measurements in single cells. The FSP was solved to a precision of at least  $10^{-4}$ . For each data set, we found the parameters which maximize the likelihood of the data  $\hat{\boldsymbol{\theta}}$  using a combination of global parameter search (via the Metropolis-Hastings algorithm) and local optimization routines (the Nelder-Mead and BFGS algorithms), implemented in the scientific Python library SciPy [3].

For the bursting gene expression model, three likelihood functions for each different approach were used. As described in the Methods section of the main text, the likelihood for a multivariate Gaussian is:

$$L(\mathbf{D}; \boldsymbol{\mu}, \boldsymbol{\Sigma}) = \prod_{t=t_1}^{t_{N_t}} \prod_{i=1}^{N_c} (2\pi^{N_o} |\boldsymbol{\Sigma}(t)|)^{-\frac{1}{2}} \quad (10)$$

$$\times \exp \left[ -\frac{1}{2} (\mathbf{d}_i(t) - \boldsymbol{\mu}(t, \boldsymbol{\theta}))^T \boldsymbol{\Sigma}^{-1}(t, \boldsymbol{\theta}) (\mathbf{d}_i(t) - \boldsymbol{\mu}(t, \boldsymbol{\theta})) \right]$$

For the LNA-based likelihood from [1], each  $\mathbf{d}_i(t)$  corresponds to an RNA measurement in a single-cell, and  $\boldsymbol{\mu}(t, \boldsymbol{\theta})$  and  $\boldsymbol{\Sigma}(t, \boldsymbol{\theta})$  are both functions of the model parameters. We find the  $\boldsymbol{\theta}$  which maximizes the logarithm of this function for each simulated data set. The sample-moments based likelihood instead compares the sample mean and sample variances as the vector  $\mathbf{d}(t) = [\mu_s(t), \boldsymbol{\Sigma}_s(t)]$ , for which there is only one value per data set (as all the data was used to find the sample mean and sample variance). In this case,  $\boldsymbol{\mu}(t, \boldsymbol{\theta})$  is the model predicted average

of the mean and variance, and  $\Sigma(t, \boldsymbol{\theta})$  is the model-predicted variance. For the one dimensional case of RNA in the bursting gene expression model,

$$\Sigma(t, \boldsymbol{\theta}) = \begin{pmatrix} \langle \tilde{x}(t, \boldsymbol{\theta})^2 \rangle & \langle \tilde{x}(t, \boldsymbol{\theta})^3 \rangle \\ \langle \tilde{x}(t, \boldsymbol{\theta})^3 \rangle & \langle \tilde{x}(t, \boldsymbol{\theta})^4 \rangle - \frac{N-3}{N-1} \langle \tilde{x}(t, \boldsymbol{\theta})^2 \rangle^2 \end{pmatrix}. \quad (11)$$

The higher order moments of the model are computed according to Eq. 36 in the main text, and the likelihood is computed according to Eq. 37.

## 4 Derivation of information for Gaussian fluctuations

The Gaussian distribution with mean and variance  $\lambda$  is defined

$$f(x, \lambda) = \frac{1}{\sqrt{2\pi\lambda}} e^{-\frac{(x-\lambda)^2}{2\lambda}}. \quad (12)$$

Computing the FIM for this Gaussian requires finding the derivative of the log-density

$$\log f(x, \lambda) = -\frac{1}{2} \log 2\pi - \frac{1}{2} \log \lambda - \frac{1}{2} \left( \frac{x^2 - 2x\lambda + \lambda^2}{\lambda} \right) \quad (13)$$

with respect to  $\lambda$ ,

$$\begin{aligned} \frac{\partial \log f(x, \lambda)}{\partial \lambda} &= -\frac{1}{2\lambda} - \frac{1}{2} \left( 1 - \frac{x^2}{\lambda^2} \right) \\ &= -\frac{1}{2} \left( -\frac{x^2}{\lambda^2} + \frac{1}{\lambda} + 1 \right) \end{aligned}$$

and squaring it:

$$\begin{aligned} \left( \frac{\partial \log f(x, \lambda)}{\partial \lambda} \right)^2 &= \frac{1}{4} \left( -\frac{x^2}{\lambda^2} + \frac{1}{\lambda} + 1 \right) \left( -\frac{x^2}{\lambda^2} + \frac{1}{\lambda} + 1 \right) \\ &= \frac{1}{4} \left( \frac{x^4}{\lambda^4} - \frac{2x^2}{\lambda^3} - \frac{2x^2}{\lambda^2} + \frac{1}{\lambda^2} + \frac{2}{\lambda} + 1 \right). \end{aligned} \quad (14)$$

To take the expected value, we need the second and fourth moments of the normal distribution, which are  $\lambda^2 + \lambda$  for the second uncentered moment and  $\lambda^4 + 6\lambda^3 + 3\lambda^2$  for the fourth uncentered moment. Thus, we have:

$$\begin{aligned} \mathbf{E} \left[ \left( \frac{\partial \log f(x, \lambda)}{\partial \lambda} \right)^2 \right] &= \frac{1}{4} \left( \frac{\lambda^4 + 6\lambda^3 + 3\lambda^2}{\lambda^4} - \frac{2(\lambda^2 + \lambda)}{\lambda^3} - \frac{2(\lambda^2 + \lambda)}{\lambda^2} + \frac{1}{\lambda^2} + \frac{2}{\lambda} + 1 \right) \\ &= \frac{1}{4} \left( \frac{4}{\lambda} + \frac{2}{\lambda^2} \right) = \frac{1}{\lambda} + \frac{1}{2\lambda^2}. \end{aligned}$$

## 5 Derivation of information for a Poisson distribution

The Poisson distribution is defined:

$$f(x, \lambda) = \frac{\lambda^x e^{-\lambda}}{x!}. \quad (15)$$

Again, by taking the log

$$\log f(x, \lambda) = x \log \lambda - \lambda - \log x! \quad (16)$$

Now, take the derivative with respect to  $\lambda$

$$\frac{\partial \log f(x, \lambda)}{\partial \lambda} = \frac{x}{\lambda} - 1, \quad (17)$$

and squaring this term yields:

$$\left(\frac{\partial \log f(x, \lambda)}{\partial \lambda}\right)^2 = \frac{x^2}{\lambda^2} - \frac{2x}{\lambda} + 1. \quad (18)$$

As the FIM is the expected value of this quantity, and the mean and variance of the Poisson distribution are given by  $\lambda$ ,

$$\begin{aligned} \mathbf{E}\left[\left(\frac{\partial \log f(x, \lambda)}{\partial \lambda}\right)^2\right] &= \mathbf{E}\left[\frac{x^2}{\lambda^2}\right] - \mathbf{E}\left[\frac{2x}{\lambda}\right] + 1 \\ &= \frac{\lambda^2 + \lambda}{\lambda^2} - 2 + 1 \\ &= \frac{1}{\lambda}. \end{aligned} \quad (19)$$

## References

- [1] Komorowski M, Costa MJ, Rand DA, Stumpf MPH. Sensitivity, robustness, and identifiability in stochastic chemical kinetics models. *Proceedings of the National Academy of Sciences of the United States of America*. 2011;108(21):8645–8650.
- [2] Ruess J, Milias-Aregetis A, Lygeros J. Designing experiments to understand the variability in biochemical reaction networks. *Journal of The Royal Society Interface*. 2013;10(88).
- [3] Jones E, Oliphant T, Peterson P, et al.. *SciPy: Open source scientific tools for Python*; 2001-2018.
